# Supplementary material for: Approximated prediction of genomic selection accuracy when reference and candidate populations are related
Source: Springer Nature journal article supplement (doi:10.1186/s12711-016-0183-3), 2016-03-03
Supplement: MOESM5 [file 12711_2016_183_MOESM5_ESM.pdf]

## Additional file 5. The case of markers in Linkage disequilibrium

### Principles

The objective is to derive  $E[x_{cl}x_{cm}X_{il}X_{im}]$  in the situation of LD. As in Supplementary Material 1, we use  $X_{im} = g_{imf} + g_{imd}$  where  $g_{imf}$  and  $g_{imd}$  are the “values” of the alleles transmitted to individual  $i$  by its father and its dam, with  $g_{imf}$  and  $g_{imd} = (0 \text{ or } 1) - p_m$ . Equivalent terms are defined for  $x_{cl}$ ,  $x_{cm}$  and  $X_{il}$ .

$$E[x_{cl}x_{cm}X_{il}X_{im}] = \sum_{s \in \{f,d\}} \sum_{t \in \{f,d\}} \sum_{u \in \{f,d\}} \sum_{v \in \{f,d\}} E[g_{cls}g_{cmt}g_{ilu}g_{imv}]$$

The random variable  $M_{cls}$  is the allele individual  $c$  received from  $s$  at locus  $l$ .  $M_{cmt}$ ,  $M_{ilu}$  and  $M_{imv}$  are defined similarly. More generally,  $M_{\alpha lf}$  and  $M_{\alpha ld}$  are the locus  $l$  allele individual  $\alpha$  received from its father and  $M_{\alpha ld}$ , from its dam.

Four types of  $g = (g_{cls}, g_{cmt}, g_{ilu}, g_{imv})$  vectors are encountered

$$\mathcal{T}_{s=t}^{u=v} : s = t \text{ and } u = v$$

$$\mathcal{T}_{s=t}^{u \neq v} : s = t \text{ and } u \neq v$$

$$\mathcal{T}_{s \neq t}^{u=v} : s \neq t \text{ and } u = v$$

$$\mathcal{T}_{s \neq t}^{u \neq v} : s \neq t \text{ and } u \neq v$$

As each of the indices  $s, t, u, v$  may be for  $d$ , a total of 16 different  $g$  vectors are possible.

In type 1, both alleles (belonging to locus  $m$  and  $l$ ) of each couple of locus (one for  $c$  and one for  $i$ ) are on the same chromosome (may be from the two fathers, the two dams,  $c$ 's father and  $i$ 's dam or  $i$ 's father and  $c$ 's dam).

In type 2, both alleles (belonging to locus  $m$  and  $l$ ) of the candidate  $c$  are on the same chromosome, while alleles of the reference  $i$  are not on the same chromosome.

Type 3 is the reverse from type 2.

In type 4, alleles of locus  $m$  and  $l$  of both individuals  $c$  and  $i$  are on different chromosomes.

For each of these situations, we consider the IBD status between alleles at locus  $m$  on chromosomes  $ct$  and  $iv$ , and at locus  $l$  on chromosomes  $cs$  and  $iu$ .

We may have

$$\mathcal{S}_{ml} = \{ M_{cmt} \equiv M_{imv} \text{ and } M_{cls} \equiv M_{ilu} \} \text{ with a probability } \varphi_{ml}^{stuv}$$

$$\mathcal{S}_{m\bar{l}} = \{ M_{cmt} \equiv M_{imv} \text{ and } M_{cls} \not\equiv M_{ilu} \} \text{ with a probability } \varphi_{m\bar{l}}^{stuv}$$

$$\mathcal{S}_{\bar{m}l} = \{ M_{cmt} \not\equiv M_{imv} \text{ and } M_{cls} \equiv M_{ilu} \} \text{ with a probability } \varphi_{\bar{m}l}^{stuv}$$

$$\mathcal{S}_{\bar{m}\bar{l}} = \{ M_{cmt} \not\equiv M_{imv} \text{ and } M_{cls} \not\equiv M_{ilu} \} \text{ with a probability } \varphi_{\bar{m}\bar{l}}^{stuv}$$

The computation of the probability  $\varphi_k^{stuv}$  depends on the type of  $g$ -vector.

$$E[g_{cls}g_{cmt}g_{ilu}g_{imv}] = \sum_{k \in \{ml, ml, ml, ml\}} \varphi_k^{stuv} E[g_{cls}g_{cmt}g_{ilu}g_{imv} | \mathcal{S}_k]$$

### Expectations $E[g_{cls}g_{cmt}g_{ilu}g_{imv} | \mathcal{S}_k]$

Let  $p_{AA} = (1 - p_m)(1 - p_l) + \Delta_{lm}$ ;  $p_{AB} = (1 - p_m)p_l - \Delta_{lm}$ ;  $p_{BA} = p_m(1 - p_l) - \Delta_{lm}$  and  $p_{BB} = p_m p_l + \Delta_{lm}$ . Under  $\mathcal{S}_{ml}$ , only 4 genotypes vectors are possible :

| $M_{cls}$ | $M_{cmt}$ | $M_{ilu}$ | $M_{imv}$ | prob[ $g_{cls}g_{cmt}g_{ilu}g_{imv}   \mathcal{S}_{ml}$ ] |                        |                        |                           | $g_{cls}g_{cmt}g_{ilu}g_{imv}$ |
|-----------|-----------|-----------|-----------|-----------------------------------------------------------|------------------------|------------------------|---------------------------|--------------------------------|
|           |           |           |           | $s = t$ and $u = v$                                       | $s = t$ and $u \neq v$ | $s \neq t$ and $u = v$ | $s \neq t$ and $u \neq v$ |                                |
| $A_l$     | $A_m$     | $A_l$     | $A_m$     | $p_{AA}$                                                  | $p_{AA}$               | $p_{AA}$               | $(1 - p_m)(1 - p_l)$      | $p_m^2 p_l^2$                  |
| $A_l$     | $B_m$     | $A_l$     | $B_m$     | $p_{BA}$                                                  | $p_{BA}$               | $p_{BA}$               | $p_m(1 - p_l)$            | $p_l^2(1 - p_m)^2$             |
| $B_l$     | $A_m$     | $B_l$     | $A_m$     | $p_{AB}$                                                  | $p_{AB}$               | $p_{AB}$               | $(1 - p_m)p_l$            | $p_m^2(1 - p_l)^2$             |
| $B_l$     | $B_m$     | $B_l$     | $B_m$     | $p_{BB}$                                                  | $p_{BB}$               | $p_{BB}$               | $p_m p_l$                 | $(1 - p_l)^2(1 - p_m)^2$       |

The expectation follows:

|                           | $E[g_{cls}g_{cmt}g_{ilu}g_{imv}   \mathcal{S}_{ml}]$          |
|---------------------------|---------------------------------------------------------------|
| $s = t$ and $u = v$       | $(1 - p_m)(1 - p_l)p_m p_l + \Delta_{lm}(1 - 2p_l)(1 - 2p_m)$ |
| $s = t$ and $u \neq v$    | $(1 - p_m)(1 - p_l)p_m p_l + \Delta_{lm}(1 - 2p_l)(1 - 2p_m)$ |
| $s \neq t$ and $u = v$    | $(1 - p_m)(1 - p_l)p_m p_l + \Delta_{lm}(1 - 2p_l)(1 - 2p_m)$ |
| $s \neq t$ and $u \neq v$ | $(1 - p_m)(1 - p_l)p_m p_l$                                   |

For other IBD status ( $\mathcal{S}_{ml}$ ,  $\mathcal{S}_{ml}$ ,  $\mathcal{S}_{ml}$ ), it must be noted that all expectations of the product  $g_{cls}g_{cmt}g_{ilu}g_{imv}$  are null in  $g$ -types different from  $\mathcal{T}_{s=t}^{u=v}$ . For instance, given  $\mathcal{R} = \{\mathcal{S}_{mt}; s = t \text{ and } u \neq v\}$ ,  $E[g_{cls}g_{cmt}g_{ilu}g_{imv} | \mathcal{R}] = E[g_{cls}g_{cmt}g_{ilu} \times E[g_{imv} | \mathcal{R}, g_{cls}, g_{cmt}, g_{ilu}] | \mathcal{R}]$ .

But  $E[g_{imv} | \mathcal{R}, g_{cls}, g_{cmt}, g_{ilu}] = E[g_{imv}] = 0$  (the variable  $g_{imv}$  is independent on the other  $g$  under  $\mathcal{R}$ ).

| $M_{cls}$ | Genotypes |           |           | Genotypes probability for IBD status: |                           |                    | Value of $g_{cls}g_{cmt}g_{ilu}g_{imv}$ |
|-----------|-----------|-----------|-----------|---------------------------------------|---------------------------|--------------------|-----------------------------------------|
|           | $M_{cmt}$ | $M_{ilu}$ | $M_{imv}$ | $\mathcal{S}_{mt}$                    | $\mathcal{S}_{ml}$        | $\mathcal{S}_{ml}$ |                                         |
| $A_l$     | $A_m$     | $A_l$     | $A_m$     | $p_{AA}^2/[1 - p_m]$                  | $p_{AA}^2/[1 - p_l]$      | $p_{AA}^2$         | $p_m^2 p_l^2$                           |
| $A_l$     | $A_m$     | $A_l$     | $B_m$     | 0                                     | $p_{AA} p_{BA}/[1 - p_l]$ | $p_{AA} p_{BA}$    | $-p_l^2 p_m(1 - p_m)$                   |
| $A_l$     | $A_m$     | $B_l$     | $A_m$     | $p_{AA} p_{AB}/[1 - p_m]$             | 0                         | $p_{AA} p_{AB}$    | $-p_m^2 p_l(1 - p_l)$                   |
| $A_l$     | $A_m$     | $B_l$     | $B_m$     | 0                                     | 0                         | $p_{AA} p_{BB}$    | $p_m(1 - p_m)^2 p_l(1 - p_l)$           |
| $A_l$     | $B_m$     | $A_l$     | $A_m$     | 0                                     | $p_{BA} p_{AA}/[1 - p_l]$ | $p_{BA} p_{AA}$    | $-p_l^2 p_m(1 - p_m)$                   |
| $A_l$     | $B_m$     | $A_l$     | $B_m$     | $p_{BA}^2/p_m$                        | $p_{BA}^2/[1 - p_l]$      | $p_{BA}^2$         | $p_l^2(1 - p_m)^2$                      |
| $A_l$     | $B_m$     | $B_l$     | $A_m$     | 0                                     | 0                         | $p_{BA} p_{AB}$    | $p_m(1 - p_m) p_l(1 - p_l)$             |
| $A_l$     | $B_m$     | $B_l$     | $B_m$     | $p_{BA} p_{BB}/p_m$                   | 0                         | $p_{BA} p_{BB}$    | $-(1 - p_m)^2 p_l(1 - p_l)$             |
| $B_l$     | $A_m$     | $A_l$     | $A_m$     | $p_{AB} p_{AA}/[1 - p_m]$             | 0                         | $p_{AB} p_{AA}$    | $-p_m^2 p_l(1 - p_l)$                   |
| $B_l$     | $A_m$     | $A_l$     | $B_m$     | 0                                     | 0                         | $p_{AB} p_{BA}$    | $p_m(1 - p_m) p_l(1 - p_l)$             |
| $B_l$     | $A_m$     | $B_l$     | $A_m$     | $p_{AB}^2/[1 - p_m]$                  | $p_{AB}^2/p_l$            | $p_{AB}^2$         | $p_m^2(1 - p_l)^2$                      |
| $B_l$     | $A_m$     | $B_l$     | $B_m$     | 0                                     | $p_{AB} p_{BB}/p_l$       | $p_{AB} p_{BB}$    | $-(1 - p_l)^2 p_m(1 - p_m)$             |
| $B_l$     | $B_m$     | $A_l$     | $A_m$     | 0                                     | 0                         | $p_{BB} p_{AA}$    | $p_m(1 - p_m) p_l(1 - p_l)$             |
| $B_l$     | $B_m$     | $A_l$     | $B_m$     | $p_{BB} p_{BA}/p_m$                   | 0                         | $p_{BB} p_{BA}$    | $-(1 - p_m)^2 p_l(1 - p_l)$             |
| $B_l$     | $B_m$     | $B_l$     | $A_m$     | 0                                     | $p_{BB} p_{AB}/p_l$       | $p_{BB} p_{AB}$    | $-(1 - p_l)^2 p_m(1 - p_m)$             |
| $B_l$     | $B_m$     | $B_l$     | $B_m$     | $p_{BB}^2/p_m$                        | $p_{BB}^2/p_l$            | $p_{BB}^2$         | $(1 - p_l)^2(1 - p_m)^2$                |

|                    | $E[g_{cls}g_{cmt}g_{ilu}g_{imv}   s = t \text{ and } u = v]$  |
|--------------------|---------------------------------------------------------------|
| $\mathcal{S}_{mt}$ | $\Delta_{lm}^2 \times [p_m^3 + (1 - p_m)^3] / [p_m(1 - p_m)]$ |
| $\mathcal{S}_{ml}$ | $\Delta_{lm}^2 \times [p_l^3 + (1 - p_l)^3] / [p_l(1 - p_l)]$ |
| $\mathcal{S}_{mt}$ | $\Delta_{lm}^2 \times (1 - 2p_m)(1 - 2p_l)$                   |

Assembling all elements we get

$$E[x_{cl}x_{cm}x_{il}x_{im}] = [(1 - p_m)(1 - p_l)p_m p_l + \Delta_{lm}(1 - 2p_l)(1 - 2p_m)] \left[ (\sum_{s \in \{f,d\}} \sum_{t \in \{f,d\}} \sum_{u \in \{f,d\}} \sum_{v \in \{f,d\}} \varphi_{ml}^{stuv}) - (\varphi_{ml}^{fada} + \varphi_{ml}^{fdaf} + \varphi_{ml}^{dfda} + \varphi_{ml}^{dffd}) \right] + \Delta_{lm}^2 \sum_{s \in \{f,d\}} \sum_{u \in \{f,d\}} [\varphi_{ml}^{ssuu} \times [p_m^3 + (1 - p_m)^3] / [p_m(1 - p_m)] + \varphi_{ml}^{ssuu} \times [p_l^3 + (1 - p_l)^3] / [p_l(1 - p_l)] + \varphi_{ml}^{ssuu} \times (1 - 2p_m)(1 - 2p_l)]$$

### Probabilities of IBD status $\mathcal{S}_k$

We are interested in genes at loci  $l$  and  $m$  individuals  $i$  and  $c$  received from specific parents denoted by  $s$  and  $u$  or  $t$  and  $v$ .

The probability  $p(M_{cmt} \equiv M_{imv}) = \varphi_m^{tv}$  (resp.  $p(M_{cls} \equiv M_{ilu}) = \varphi_l^{su}$ ) equals the coancestry coefficient between  $t$  and  $v$  (resp.  $s$  and  $u$ ). It is estimated the usual way.

We only need to develop  $\varphi_{ml}^{stuv} = p(\mathcal{S}_{ml}) = p(M_{cmt} \equiv M_{imv} \text{ and } M_{cls} \equiv M_{ilu})$ . Indeed, the other terms are given by:

$$\varphi_{mt}^{stuv} = p(M_{cmt} \equiv M_{imv}) - p(M_{cmt} \equiv M_{imv} \text{ and } M_{cls} \equiv M_{ilu}) = \varphi_m^{tv} - \varphi_{ml}^{stuv}$$

$$\varphi_{ml}^{stuv} = p(M_{cls} \equiv M_{ilu}) - p(M_{cmt} \equiv M_{imv} \text{ and } M_{cls} \equiv M_{ilu}) = \varphi_l^{su} - \varphi_{ml}^{stuv}$$

$$\varphi_{ml}^{stuv} = 1 - (\varphi_{ml}^{stuv} + \varphi_{mt}^{stuv} + \varphi_{ml}^{stuv}) = 1 - (\varphi_m^{tv} + \varphi_l^{su}) + \varphi_{ml}^{stuv}$$

We first examine the situation of a single locus (say  $l$ ). Given the pedigree, different genealogical chains linking  $c$  and  $i$  are often possible. They will be indexed  $pl = 1 \dots Nl_p$  (and  $pm = 1 \dots Nm_p$  when considering the  $m$  locus). A chain is characterized by a shared ancestor  $a_{pl}$  and consists of two subchains ( $pl_c$  and  $pl_i$ ) linking  $a_{pl}$  to  $c$  and to  $i$ . In graph theory, these subchains are made of edges with nodes (the individuals) linked by arcs (characterizing transmission events). Subchain  $pl_c$  (resp.  $pl_i$ ) comprises one and only one parent of  $c$  (resp.  $i$ ). The ancestor may be  $c$  or  $i$  themselves, in which case the chain is extended to one parent on this ancestor. The lengths (numbers of generations) of the  $pl_c$  and  $pl_i$  subchains will be noted  $n_{a_{pl}c}$  and  $n_{a_{pl}i}$ . We will note  $\alpha = \{\alpha_1, \alpha_2 \dots \alpha_{n_{a_{pl}c}-1}\}$  and  $\beta = \{\beta_1, \beta_2 \dots \beta_{n_{a_{pl}i}-1}\}$  the lists of intermediate individuals belonging to  $pl_c = \{c, \alpha, a_{pl}\}$  and  $pl_i = \{i, \beta, a_{pl}\}$ . We are interested in the ancestor allele  $M_{a_{pl}lw}$  shared by individuals  $c$  and to  $i$ . Genders ( $f$  or  $d$ ) of individual  $\omega$  will be noted  $\mathcal{G}(\omega)$ .

The IBD status  $M_{cls} \equiv M_{ilu}$  occurs if the allele at locus  $l$  carried by chromosomes transmitted by  $s$  to  $c$  and transmitted by  $u$  to  $i$  both come from the same ancestor allele carried by  $a_{pl}$ :  $M_{cls} \equiv M_{ilu}$  if

$$\begin{cases} s = \mathcal{G}(\alpha_1) \text{ and } u = \mathcal{G}(\beta_1) \\ M_{cls} \equiv M_{\alpha_1 \mathcal{G}(\alpha_2)} \equiv M_{\alpha_2 \mathcal{G}(\alpha_3)} \dots \equiv M_{a_{pl}w} \text{ and } M_{ilu} \equiv M_{\beta_1 \mathcal{G}(\beta_2)} \equiv M_{\beta_2 \mathcal{G}(\beta_3)} \dots \equiv M_{a_{pl}w} \text{ with } wl = f \text{ or } d \end{cases}$$

In other words the  $M_{a_{pl}wl}$  allele was transmitted :

- along the  $pl_c$  subchain to  $c$  via  $s$  (event  $J_{pl_c, wl}^l = \{M_{cls} \equiv M_{\alpha_1 lG(\alpha_2)} \equiv M_{\alpha_2 lG(\alpha_3)} \cdots \equiv M_{a_{pl}wl}\}$ ) and
- along the  $pl_i$  subchain to  $i$  via  $u$  (event  $J_{pl_i, wl}^l = \{M_{ilu} \equiv M_{\beta_1 lG(\beta_2)} \equiv M_{\beta_2 lG(\beta_3)} \cdots \equiv M_{a_{pl}wl}\}$ )

$$prob(J_{pl_c, wl}^l) = prob(M_{cls} \equiv M_{\alpha_1 lG(\alpha_2)}) prob(M_{\alpha_1 lG(\alpha_2)} \equiv M_{\alpha_2 lG(\alpha_3)} | M_{cls} \equiv M_{\alpha_1 lG(\alpha_2)}) \cdots$$

Transmissions events between generations being independent, for a single locus ( $l$  in the current example),  $prob(J_{pl_c, wl}^l) = \frac{1}{2}^{n_{a_{pl}c}}$  and  $prob(J_{pl_i, wl}^l) = \frac{1}{2}^{n_{a_{pl}i}}$ .

It must be noted that  $pl_c$  and  $pl_i$  may share edges. In these situations  $prob(J_{pl_c, wl}^l \cap J_{pl_i, wl}^l) = prob(J_{pl_c, wl}^l) prob(J_{pl_i, wl}^l | J_{pl_c, wl}^l) \neq prob(J_{pl_c, wl}^l) prob(J_{pl_i, wl}^l)$ : If  $n_s$  edges belong to both  $pl_c$  and  $pl_i$ ,  $prob(J_{pl_i, wl}^l | J_{pl_c, wl}^l) = \frac{1}{2}^{n_{a_{pl}i} - n_s}$ . Thus  $p(M_{cls} \equiv M_{ilu} | pl, wl) = \frac{1}{2}^{n_{a_{pl}c} + n_{a_{pl}i} - n_s}$

As there is two possible ancestral alleles ( $M_{a_{pl}wl}$  with  $wl = f$  or  $d$ ) shared by chromosomes transmitted by  $s$  to  $c$  and transmitted by  $u$  to  $i$ , we finally get the classical  $p(M_{cls} \equiv M_{ilu} | pl) = \frac{1}{2}^{n_{a_{pl}c} + n_{a_{pl}i} - 1 - n_s}$ . IBD status  $M_{cls} \equiv M_{ilu}$  due to the transmission by the different possible chains being exclusive, the unconditional probability is  $p(M_{cls} \equiv M_{ilu}) = \sum_{pl} \frac{1}{2}^{n_{a_{pl}c} + n_{a_{pl}i} - 1 - n_s}$

When considering both loci  $l$  and  $m$  simultaneously, all possible pairs  $(pl, pm)$  of genealogical chains and parental origins of ancestor alleles linking  $c$  and  $i$  must be examined.

$$\varphi_{ml}^{stuv} = p(M_{cmt} \equiv M_{imv} \text{ and } M_{cls} \equiv M_{ilu}) = \sum_{pl, wl} \sum_{pm, wm} p(M_{cmt} \equiv M_{imv} \text{ and } M_{cls} \equiv M_{ilu} | pl, wl, pm, wm)$$

$$\varphi_{ml}^{stuv} = \sum_{pl, wl} \sum_{pm, wm} p(M_{cls} \equiv M_{ilu} | pl, wl) p(M_{cmt} \equiv M_{imv} | M_{cls} \equiv M_{ilu}, pl, wl, pm, wm)$$

Previous definitions are extended to  $pm$  chain: to  $pm$  corresponds ancestor  $a_{pm}$ , vectors  $\gamma$  and  $\delta$  are counterparts of  $\alpha$  and  $\beta$  and events  $J_{pm_c, wm}^m$  and  $J_{pm_i, wm}^m$  of events  $J_{pl_c, wl}^l$  and  $J_{pl_i, wl}^l$ . We have

$$M_{cmt} \equiv M_{imv} \text{ if}$$

$$\begin{cases} t = \mathcal{G}(\gamma_1) \text{ and } v = \mathcal{G}(\delta_1) \\ M_{cmt} \equiv M_{\gamma_1 m \mathcal{G}(\gamma_2)} \equiv M_{\gamma_2 m \mathcal{G}(\gamma_3)} \cdots \equiv M_{a_{pm}mw} \text{ and } M_{imv} \equiv M_{\delta_1 m \mathcal{G}(\delta_2)} \equiv M_{\delta_2 m \mathcal{G}(\delta_3)} \cdots \equiv M_{a_{pm}mw} \text{ with } w = f \text{ or } d \end{cases}$$

$$p(M_{cmt} \equiv M_{imv} | M_{cls} \equiv M_{ilu}, pl, wl, pm, wm) = p(J_{pm_c, wm}^m \cap J_{pm_i, wm}^m | J_{pl_c, wl}^l \cap J_{pl_i, wl}^l)$$

The  $pm$  chain may be partially confounded with  $pl$  chain: an edge  $(\gamma_k, \gamma_{k+1})$  from  $pm$  may or not be present in  $pl$ . If not,  $prob(M_{\gamma_k m \mathcal{G}(\gamma_{k+1})} \equiv M_{\gamma_{k+1} m \mathcal{G}(\gamma_{k+2})} | J_{pl_c, wl}^l \cap J_{pl_i, wl}^l) = 1/2$ . If  $(\gamma_k, \gamma_{k+1}) = (\alpha_h, \alpha_{h+1})$  is both in  $pm$  and  $pl$ , the probability simplifies to

$prob(M_{\gamma_k m \mathcal{G}(\gamma_{k+1})} \equiv M_{\gamma_{k+1} m \mathcal{G}(\gamma_{k+2})} | M_{\alpha_h l \mathcal{G}(\alpha_{h+1})} \equiv M_{\alpha_{h+1} l \mathcal{G}(\alpha_{h+2})})$ . In this case, either  $\gamma_{k+2} = \alpha_{h+2}$  (alleles at locus  $l$  and  $m$  transmitted by  $\gamma_{k+1} = \alpha_{h+1}$  to  $\gamma_k = \alpha_h$  were on the same grand parental chromosome), giving

$prob(M_{\gamma_k m \mathcal{G}(\gamma_{k+1})} \equiv M_{\gamma_{k+1} m \mathcal{G}(\gamma_{k+2})} | M_{\alpha_h l \mathcal{G}(\alpha_{h+1})} \equiv M_{\alpha_{h+1} l \mathcal{G}(\alpha_{h+2})}) = 1 - r_{ml}$ , or  $\gamma_{k+2} \neq \alpha_{h+2}$ , giving  $prob(M_{\gamma_k m \mathcal{G}(\gamma_{k+1})} \equiv M_{\gamma_{k+1} m \mathcal{G}(\gamma_{k+2})} | M_{\alpha_h l \mathcal{G}(\alpha_{h+1})} \equiv M_{\alpha_{h+1} l \mathcal{G}(\alpha_{h+2})}) = r_{ml}$ .

Computing  $\varphi_{ml}^{stuv}$ , all types of  $g = (g_{cls}, g_{cmt}, g_{ilu}, g_{imv})$  vectors must be considered ( $\mathcal{J}_{s=t}^{u=v}, \mathcal{J}_{s=t}^{u \neq v}, \mathcal{J}_{s \neq t}^{u=v}, \mathcal{J}_{s \neq t}^{u \neq v}$ ) for all combination of  $pl$  and  $pm$  chains.

## Examples

A.  $i$  and  $c$  are unrelated

In this case, probability  $\varphi_{\cancel{ml}}^{ssuu} = 1$  is the only non null, and the expectation turns to be:

$$E[x_{cl}x_{cm}x_{il}x_{im}] = 4\Delta_{lm}^2(1 - 2p_m)(1 - 2p_l)$$

B.  $i$  is one of  $c$ 's parents

Two chains are possible:  $p_1 = a_{p_1} \rightarrow i \rightarrow c$  and  $p_2 = a_{p_2} \rightarrow i \rightarrow c$  with  $a_{p_1}$  and  $a_{p_2}$ , parents of  $i$  as ancestors. Here  $n_{a_{p_1}c} = 2, n_{a_{p_1}i} = 1, n_s = 1$ .

a.  $l$  and  $m$  genes on the same chromosome in  $c$  and  $i$  ( $\mathcal{J}_{s=t}^{u=v}$ )

Non null probabilities are

$$p(M_{cls} \equiv M_{ilu} | pl, wl) = \frac{1}{4} \text{ if } \mathcal{G}(i) = s \text{ and } \mathcal{G}(a_{pl}) = u; \forall wl = f \text{ or } d \text{ and } \forall pl = p_1 \text{ or } p_2$$

$$p(M_{cms} \equiv M_{imu} | M_{cls} \equiv M_{ilu}, pl, wl, pm, wm) = (1 - r_{ml})^2 \text{ if } \mathcal{G}(i) = s, \mathcal{G}(a_{pl}) = u; pl = pm, wl = wm$$

$$p(M_{cms} \equiv M_{imu} | M_{cls} \equiv M_{ilu}, pl, wl, pm, wm) = r_{ml}(1 - r_{ml}) \text{ if } \mathcal{G}(i) = s, \mathcal{G}(a_{pl}) = u; pl = pm, wl \neq wm$$

$$\text{Finally, } \varphi_{ml}^{ssuu} = \sum_{pl} \frac{1}{4} ((1 - r_{ml})^2 + r_{ml}(1 - r_{ml})) = \sum_{pl} \frac{1}{4} (1 - r_{ml}) = \frac{1 - r_{ml}}{2}$$

$$\varphi_{\cancel{ml}}^{ssuu} = \frac{r_{ml}}{2}; \varphi_{\cancel{ml}}^{ssuu} = \frac{r_{ml}}{2}; \varphi_{\cancel{ml}}^{ssuu} = \frac{1 - r_{ml}}{2}$$

b.  $l$  and  $m$  genes on the same chromosome in  $c$ , on two chromosomes in  $i$  ( $\mathcal{J}_{s=t}^{u \neq v}$ )

$$p(M_{cls} \equiv M_{ilu} | pl, wl) = \frac{1}{4} \text{ if } \mathcal{G}(i) = s \text{ and } \mathcal{G}(a_{pl}) = u; \forall wl = f \text{ or } d \text{ and } \forall pl = p_1 \text{ or } p_2$$

$$p(M_{cms} \equiv M_{imv} | M_{cls} \equiv M_{ilu}, pl, wl, pm, wm) = p(M_{cms} \equiv M_{im\mathcal{G}(a_{pm})} | M_{cls} \equiv M_{i\mathcal{G}(a_{pl})}) p(M_{im\mathcal{G}(a_{pm})} \equiv M_{a_{pm}mwm}) = \frac{1}{2} r_{ml} \text{ if } \mathcal{G}(i) = s, \mathcal{G}(a_{pl}) = u, \mathcal{G}(a_{pm}) = v; pl \neq pm, wl \neq wm. \text{ Indeed, as } u \neq v, (1) \text{ either } pl = p_1 \text{ and } pm = p_2, \text{ or } pl = p_2 \text{ and } pm = p_1 \text{ and } (2) \text{ either } wl = f \text{ and } wm = d, \text{ or } wl = d \text{ and } wm = f$$

$$\text{Finally, } \varphi_{ml}^{ssuv} = \sum_{pl, wl} \frac{1}{8} r_{ml} = \frac{r_{ml}}{2}$$

$$\varphi_{\cancel{ml}}^{ssuv} = \frac{1 - r_{ml}}{2}; \varphi_{\cancel{ml}}^{ssuv} = \frac{1 - r_{ml}}{2}; \varphi_{\cancel{ml}}^{ssuv} = \frac{r_{ml}}{2}$$

c.  $l$  and  $m$  genes are on two chromosomes in  $c$  ( $\mathcal{J}_{s \neq t}^{u=v}$  or  $\mathcal{J}_{s \neq t}^{u \neq v}$ )

In these cases  $p(M_{cmt} \equiv M_{imu} | M_{cls} \equiv M_{ilu}, pl, wl, pm, wm) = 0$  since parent  $i$  cannot be both  $c$  sire and dam.

$$\varphi_{ml}^{stuu} = 0; \varphi_{m\bar{l}}^{stuu} = \frac{1}{2}; \varphi_{\bar{m}l}^{stuu} = \frac{1}{2}; \varphi_{\bar{m}\bar{l}}^{stuu} = 0$$

$$\varphi_{ml}^{stuv} = 0; \varphi_{m\bar{l}}^{stuv} = \frac{1}{2}; \varphi_{\bar{m}l}^{stuv} = \frac{1}{2}; \varphi_{\bar{m}\bar{l}}^{stuv} = 0$$

Using these probabilities, the expectation turns to be:

$$E[x_{cl}x_{cm}X_{il}X_{im}] = (1-p_m)(1-p_l)p_m p_l + \Delta_{lm}(1-2p_l)(1-2p_m) + 2\Delta_{lm}^2 \left[ r_{ml} \left( \frac{p_m^3 + (1-p_m)^3}{p_m(1-p_m)} + \frac{p_l^3 + (1-p_l)^3}{p_l(1-p_l)} \right) + (1-r_{ml})(1-2p_m)(1-2p_l) \right]$$

When there is no linkage disequilibrium,  $E[x_{cl}x_{cm}X_{il}X_{im}] = (1-p_m)(1-p_l)p_m p_l = 4\sigma_m^2 \sigma_l^2 a_{ci}^2$  as expected.

C.  $i$  and  $c$  had the same sire

Only one genealogical chain links  $i$  and  $c$  with subchains  $p_c = a_p \rightarrow c$  and  $p_i = a_p \rightarrow i$  with  $a_p$  their sire. Here  $n_{a_p c} = n_{a_p i} = 1, n_s = 0$ . Non null probabilities are obtained only when  $l$  and  $m$  genes on the same chromosome in  $c$  and  $(\mathcal{J}_{s=t}^{u=v})$ , and when  $s = u = f = \mathcal{G}(a_p)$ . In this case we have:

$$p(M_{cls} \equiv M_{ilu} | p, wl) = p(M_{cls} \equiv M_{a_p lwl} \& M_{ilu} \equiv M_{a_p lwl} | p, wl) = \frac{1}{4} \quad \forall wl = f \text{ or } d$$

$$p(M_{cms} \equiv M_{imu} | M_{cls} \equiv M_{ilu}, p, wl, wm) = p(M_{cms} \equiv M_{a_p mwm} | M_{cls} \equiv M_{a_p lwl}, p, wl, wm) p(M_{imu} \equiv M_{a_p mwm} | M_{ilu} \equiv M_{a_p lwl}, p, wl, wm) = (1-r_{ml})^2 \quad \text{if } wl = wm, r_{ml}^2 \quad \text{if } wl \neq wm$$

$$\text{Finally, } \varphi_{ml}^{ssuu} = \frac{1}{2} \left( (1-r_{ml})^2 + r_{ml}^2 \right) = \varphi_{\bar{m}\bar{l}}^{ssuu} \text{ and } \varphi_{m\bar{l}}^{ssuu} = \varphi_{\bar{m}l}^{ssuu} = r_{ml}(1-r_{ml})$$

$$E[x_{cl}x_{cm}X_{il}X_{im}] = \frac{(1-r_{ml})^2 + r_{ml}^2}{2} [(1-p_m)(1-p_l)p_m p_l + (\Delta_{lm} + \Delta_{lm}^2)(1-2p_l)(1-2p_m)] + r_{ml}(1-r_{ml})\Delta_{lm}^2 \left( \frac{p_m^3 + (1-p_m)^3}{p_m(1-p_m)} + \frac{p_l^3 + (1-p_l)^3}{p_l(1-p_l)} \right)$$
