# Supplementary material for: Approximated prediction of genomic selection accuracy when reference and candidate populations are related
Source: Springer Nature journal article supplement (doi:10.1186/s12711-016-0183-3), 2016-03-03
Supplement: MOESM6 [file 12711_2016_183_MOESM6_ESM.pdf]

## Additional file 6. Another demonstration of Goddard et al (2011)[18] accuracy

Genotypes are coded using the standardized  $x_{im} = (a_{im} - 2p_m)/\sigma_m$ . The statistical model is  $\mathbf{y} = \mathbf{X}\boldsymbol{\beta} + \mathbf{e}$  and the aim is to predict  $g = \mathbf{W}\boldsymbol{\beta}$ . Marker effects are distributed in  $\mathcal{L}(\mathbf{0}, \mathbf{I}\sigma_\beta^2)$ . The  $\mathbf{y}$  distribution conditional to  $\mathbf{X}$  is such that  $E(\mathbf{y}|\mathbf{X}) = \mathbf{0}$  and  $v(\mathbf{y}|\mathbf{X}) = \mathbf{X}\mathbf{X}'\sigma_\beta^2 + \mathbf{I}\sigma_e^2$ . The total phenotypic variance is  $v(\mathbf{y}) = v_{\mathbf{X}}[E(\mathbf{y}|\mathbf{X})] + E_{\mathbf{X}}[v(\mathbf{y}|\mathbf{X})] = E_{\mathbf{X}}[v(\mathbf{y}|\mathbf{X})] = n_M E[\mathbf{G}]\sigma_\beta^2 + \mathbf{I}\sigma_e^2$ , where  $\mathbf{G}$  is the genomic matrix. The markers BLUP is  $\hat{\boldsymbol{\beta}} = (\mathbf{X}'\mathbf{X} + \mathbf{I}\lambda_\beta)^{-1}\mathbf{X}'\mathbf{y} = \mathbf{P}\mathbf{y}$  and the GEBVs are  $\hat{\mathbf{g}} = \mathbf{W}\mathbf{P}\mathbf{y} = \mathbf{S}\mathbf{y}$ .

Let  $\mathbf{P}\mathbf{X} = \mathbf{T} = \mathbf{T}'$  giving  $\mathbf{P}(\mathbf{X}\mathbf{X}' + \mathbf{I}\lambda_\beta)\mathbf{P}' = \mathbf{X}'\mathbf{X}(\mathbf{X}\mathbf{X}' + \mathbf{I}\lambda_\beta)^{-1} = \mathbf{T} = \mathbf{I} - \lambda_\beta(\mathbf{X}\mathbf{X}' + \mathbf{I}\lambda_\beta)^{-1}$

$$\text{We look for } E[r^2] = \frac{\text{cov}^2(\mathbf{g}, \hat{\mathbf{g}})}{v(\mathbf{g})v(\hat{\mathbf{g}})}$$

$$v(\mathbf{g}) = v(\mathbf{W}\boldsymbol{\beta}) = E_{\mathbf{W}}[v_{\beta}[\mathbf{W}\boldsymbol{\beta}|\mathbf{W}]] + v_{\mathbf{W}}[E_{\beta}[\mathbf{W}\boldsymbol{\beta}|\mathbf{W}]] = E_{\mathbf{W}}[v_{\beta}[\mathbf{W}\boldsymbol{\beta}|\mathbf{W}]] = E_{\mathbf{W}}[\mathbf{W}\mathbf{I}\sigma_\beta^2\mathbf{W}']$$

$$\text{Thus } v(\mathbf{g}) = E[\mathbf{W}']\mathbf{I}\sigma_\beta^2 E[\mathbf{W}] + \text{tr}[\mathbf{I}\sigma_\beta^2 v(\mathbf{W})] = \sigma_\beta^2 \sum_{m=1}^{n_M} \sigma_{wm}^2.$$

$$v(\hat{\mathbf{g}}) = E_{\mathbf{W}, \mathbf{X}}[v(\hat{\mathbf{g}}|\mathbf{W}, \mathbf{X})] + v_{\mathbf{W}, \mathbf{X}}[E(\hat{\mathbf{g}}|\mathbf{W}, \mathbf{X})] = E_{\mathbf{W}, \mathbf{X}}[v(\hat{\mathbf{g}}|\mathbf{W}, \mathbf{X})]$$

$$v(\hat{\mathbf{g}}|\mathbf{W}, \mathbf{X}) = \mathbf{W}\mathbf{P}(\mathbf{X}\mathbf{X}'\sigma_\beta^2 + \mathbf{I}\sigma_e^2)\mathbf{P}'\mathbf{W}' = \mathbf{W}\mathbf{T}\mathbf{W}'\sigma_\beta^2$$

$$E_{\mathbf{W}, \mathbf{X}}[v(\hat{\mathbf{g}}|\mathbf{W}, \mathbf{X})] = \sigma_\beta^2 E_{\mathbf{X}}[E_{\mathbf{W}}[\mathbf{W}\mathbf{T}\mathbf{W}'|\mathbf{X}]]$$

$$\text{Let } \varphi_{\mathbf{W}} = E[\mathbf{W}|\mathbf{X}], \text{ we get } E_{\mathbf{W}, \mathbf{X}}[v(\hat{\mathbf{g}}|\mathbf{W}, \mathbf{X})] = \sigma_\beta^2 E_{\mathbf{X}}[\varphi_{\mathbf{W}}\mathbf{T}\varphi_{\mathbf{W}}' + \text{tr}\{\mathbf{T}v(\mathbf{W}|\mathbf{X})\}]$$

$$v(\hat{\mathbf{g}}) = \sigma_\beta^2 (E_{\mathbf{X}}[\varphi_{\mathbf{W}}\mathbf{T}\varphi_{\mathbf{W}}'] + E_{\mathbf{X}}[\text{tr}\{\mathbf{T}\mathbf{D}_{\mathbf{W}|\mathbf{X}}\}])$$

$$\text{cov}(\mathbf{g}, \hat{\mathbf{g}}) = E_{\mathbf{W}, \mathbf{X}}[\text{cov}(\mathbf{g}, \hat{\mathbf{g}}|\mathbf{W}, \mathbf{X})] + \text{cov}_{\mathbf{W}, \mathbf{X}}[E(\hat{\mathbf{g}}|\mathbf{W}, \mathbf{X}), E(\mathbf{g}|\mathbf{W}, \mathbf{X})] = E_{\mathbf{W}, \mathbf{X}}[\text{cov}(\mathbf{g}, \hat{\mathbf{g}}|\mathbf{W}, \mathbf{X})]$$

$$\text{cov}(\mathbf{g}, \hat{\mathbf{g}}|\mathbf{W}, \mathbf{X}) = \text{cov}(\mathbf{W}\boldsymbol{\beta}, \mathbf{W}(\mathbf{X}\mathbf{X}' + \mathbf{I}\lambda_\beta)^{-1}\mathbf{X}'(\mathbf{X}\boldsymbol{\beta} + \mathbf{e})|\mathbf{W}, \mathbf{X})$$

$$\text{cov}(\mathbf{g}, \hat{\mathbf{g}}|\mathbf{W}, \mathbf{X}) = \text{cov}(\mathbf{W}\boldsymbol{\beta}, \mathbf{W}\mathbf{T}\boldsymbol{\beta}|\mathbf{W}, \mathbf{X}) = \mathbf{W}\mathbf{T}\mathbf{W}'\sigma_\beta^2$$

$$\text{Thus } \text{cov}(\mathbf{g}, \hat{\mathbf{g}}) = v(\hat{\mathbf{g}})$$

$$\text{and } E[r^2] = \frac{v(\hat{\mathbf{g}})}{v(\mathbf{g})} = \frac{\sigma_\beta^2 (E_{\mathbf{X}}[\varphi_{\mathbf{W}}\mathbf{T}\varphi_{\mathbf{W}}'] + E_{\mathbf{X}}[\text{tr}\{\mathbf{T}\mathbf{D}_{\mathbf{W}|\mathbf{X}}\}])}{\sigma_\beta^2 \sum_{m=1}^{n_M} \sigma_{wm}^2}$$

If we now suppose that

- Individuals are unrelated  $\varphi_{\mathbf{W}} = E_{\mathbf{W}}[\mathbf{W}|\mathbf{X}] = E_{\mathbf{W}}[\mathbf{W}] = \mathbf{0}$  et  $\mathbf{D}_{\mathbf{W}|\mathbf{X}} = \mathbf{D}_{\mathbf{W}}$
- Markers are in L.E.  $v(\mathbf{W}) = \mathbf{D}_{\mathbf{W}} = \mathbf{I}$
- $\mathbf{X}'\mathbf{X} \sim E[\mathbf{X}'\mathbf{X}] = n_R \mathbf{I}$

$$E[r^2] = \frac{E_{\mathbf{X}}[\text{tr}\{\mathbf{T}\}]}{n_M} \text{ with } E_{\mathbf{X}}[\text{tr}\{\mathbf{T}\}] = E_{\mathbf{X}}\left[n_M - \lambda_\beta \frac{n_M}{n_R + \lambda_\beta}\right] = \frac{n_R n_M}{n_R + \lambda_\beta}$$

$$\text{Finally } E[r^2] = \frac{n_R}{n_R + \lambda_\beta} = \frac{n_R}{n_R + n_M \lambda} = \frac{\frac{n_R}{n_M} h^2}{\frac{n_R}{n_M} h^2 + 1 - h^2}$$
